# Supplementary material for: Pathway analysis of kidney cancer using proteomics and metabolic profiling
Source: PubMed Central journal article supplement (PMC1665458; doi:10.1186/1476-4598-5-64), 2006-11-24
Supplement: 1476-4598-5-64-S1.pdf [file 1476-4598-5-64-S1.pdf]

Supplemental Figure 1: Automatic annotation of *de novo* amino acid sequence on tryptic peptide m/z 1163 of HSP27 by ABI 4700 De Novo Explorer. The y ion series is shown in green, b ions in red, a ions in blue, and immonium ions and internal peptides in purple. The sequence determined from this spectrum LFDKAFGLPR correctly reflects the actual sequence LFDQAFGLPR of this peptide with the exception of amino acids that have very similar masses and cannot be distinguished by MALDI-TOF/TOF MS (K/Q).

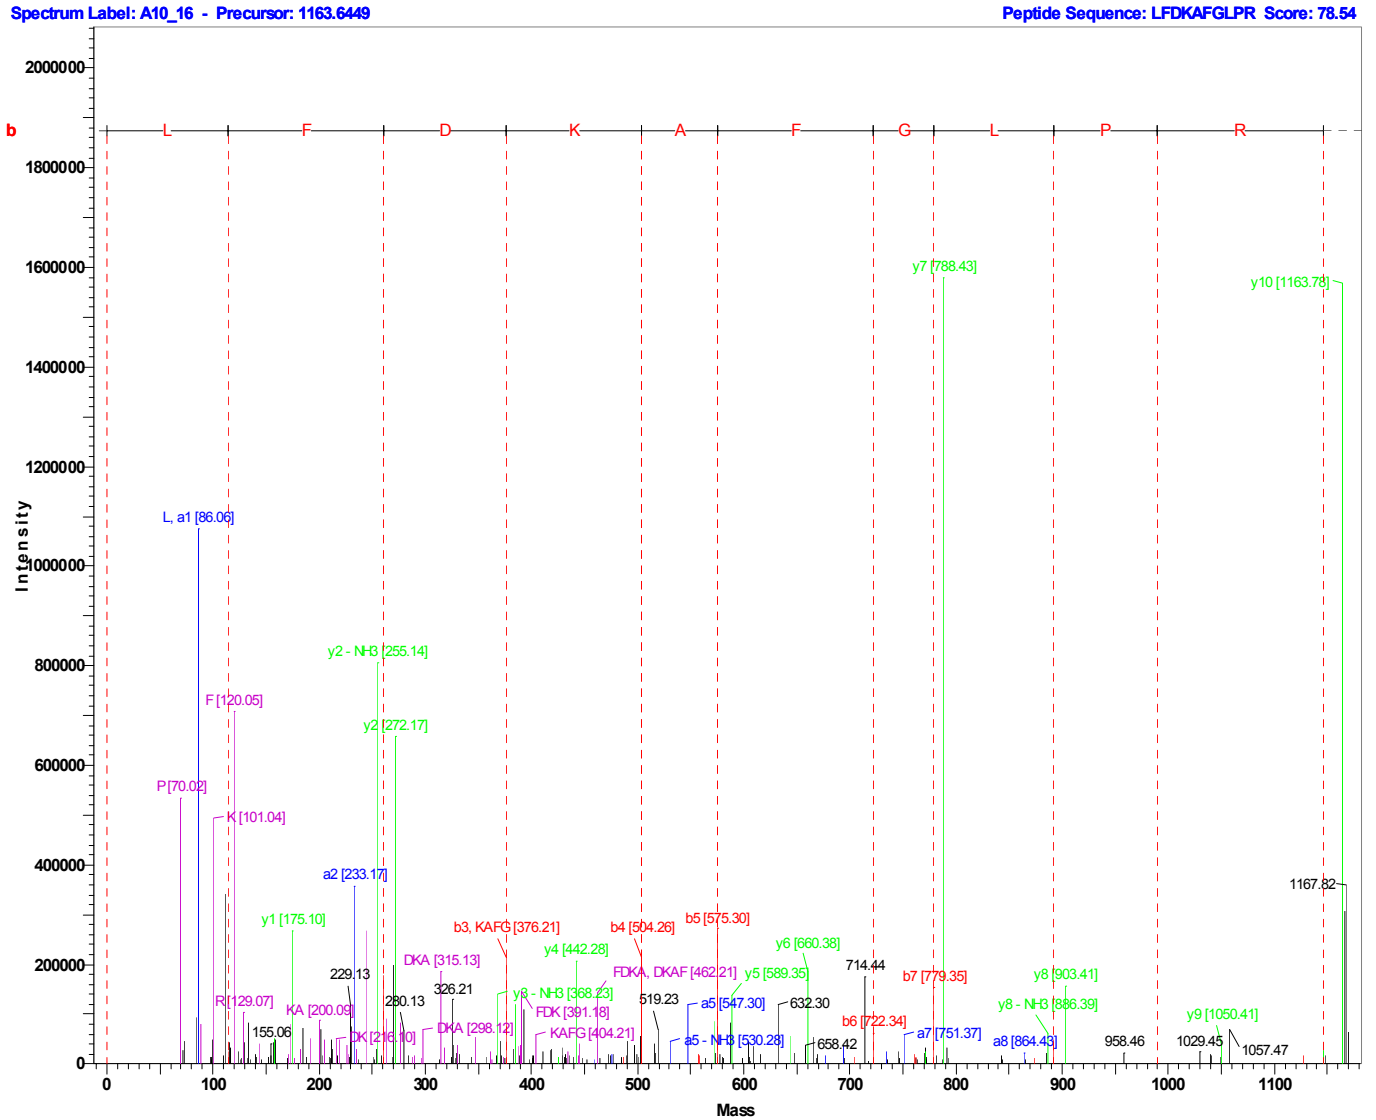

Supplemental Fig. 2: Immunohistochemical analysis shows increased nuclear staining of phospho-Hsp27 in ccRCC cells (left) as compared to normal tubular cells (right).

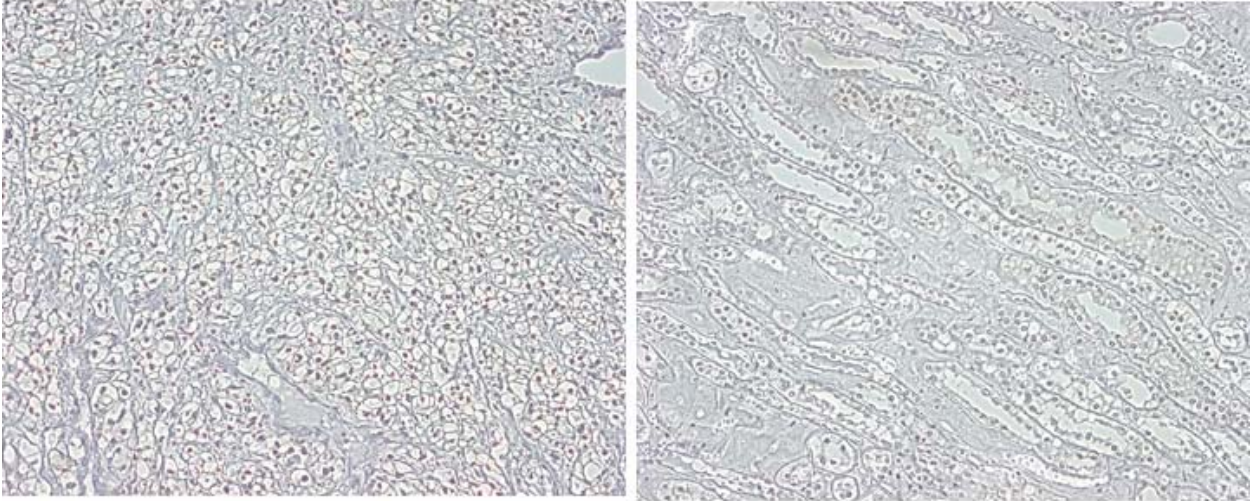

Supplemental Fig. 3: Enriched Panther biological processes (pvalue < 0.01). The RCC 31 protein set is compared to a human reference set of 23,401 translated transcripts and allocated in 242 biological process classes. Red bars corresponds to percentage of proteins attributed to a given process when looking at the 23,401 human reference set. Blue bars correspond to percentage of proteins from the RCC 31 protein sets. Yellow bars indicate the process which we identified from our proteomic analysis to have a significance greater than 0.01. Glycolysis is the most significant pathway seen by this analysis. (see separate file: SupFig3.pdf)

Supplemental Table 1: All identified proteins which were altered in ccRCC as compared to normal tissue

| spot ID | Protein name                                      | SwissProt ID | Entrez Gene ID | RCC:normal kidney | SEM  | pValue | Mascot score | MS Seq. coverage |
|---------|---------------------------------------------------|--------------|----------------|-------------------|------|--------|--------------|------------------|
| 3up     | enolase 2                                         | P09104       | 2026           | 32.8              | 11.7 | 0.0364 | 442          | 32%              |
| 4up     | beta-tubulin                                      | P07437       | 7280           | 19.5              | 5.9  | 0.0264 | 425          | 36%              |
| 5up     | coronin 1A (actin-binding protein)                | P31146       | 11151          | 12.8              | 7.0  | 0.0960 | 469          | 42%              |
| 6up     | pyruvate kinase 3                                 | P14618       | 5315           | 14.7              | 3.7  | 0.0170 | 509          | 28%              |
| 8up     | GA-3-PDH                                          | P04406       | 2597           | 5.2               | 3.4  | 0.1523 | 325          | 34%              |
| 28up    | Brain-type fatty acid binding protein             | O15540       | 2173           | 6.3               | 1.7  | 0.0262 | 736          | 84%              |
| 2up     | protein disulfide isomerase-related protein 5     | Q15084       | 10954          | 2.2               | 0.5  | 0.0522 | 771          | 52%              |
| 7up     | fructose-1,2, bisphosphate aldolase A             | P04075       | 226            | 3.1               | 0.9  | 0.0515 | 731          | 37%              |
| 9up     | GA-3-PDH                                          | P04406       | 2597           | 2.1               | 0.5  | 0.0450 | 300          | 45%              |
| 10up    | GA-3-PDH                                          | P04406       | 2597           | 3.3               | 1.8  | 0.1488 | 303          | 49%              |
| 11up    | L-LDH A                                           | P00388       | 3939           | 3.8               | 1.0  | 0.0383 | 564          | 38%              |
| 12up    | ANXA2 protein (Annexin A2)                        | P07355       | 302            | 2.2               | 0.6  | 0.0686 | 950          | 66%              |
| 13up    | Annexin V                                         | P08758       | 308            | 2.3               | 0.4  | 0.0245 | 424          | 54%              |
| 14up    | chloride intracellular channel 1 variant (CLIC 1) | O00299       | 1192           | 2.8               | 0.7  | 0.0414 | 621          | 73%              |
| 16up    | Proteasome activator complex subunit 2            | Q9UL46       | 307            | 2.2               | 0.5  | 0.0460 | 447          | 57%              |
| 18up    | Annexin A4                                        | P09525       | 307            | 3.7               | 1.2  | 0.0540 | 881          | 68%              |
| 19up    | Annexin A4                                        | Q6P452       | 307            | 2.7               | 0.5  | 0.0225 | 165          | 28%              |
| 20up    | heat shock protein 27                             | P04792       | 3315           | 2.4               | 0.4  | 0.0256 | 454          | 69%              |
| 26up    | initiation factor 5A isoform 1                    | P63241       | 1984           | 2.3               | 0.6  | 0.0706 | 372          | 48%              |
| 56up    | beta-microglobulin (BM)                           | P61769       | 567            | 3.1               | 1.0  | 0.0673 | 185          | 71%              |
| 57up    | PKCi substrate analog                             | P49773       | 3094           | 2.4               | 0.5  | 0.0482 | 234          | 77%              |
| 58up    | cystatin B                                        | P04080       | 1476           | 4.0               | 1.0  | 0.0464 | 405          | 64%              |
| 1down   | HSP60                                             | P10809       | 3329           | 0.4               | 0.1  | 0.0019 | 748          | 39%              |
| 2down   | HSP90 (fragment)                                  | P08238       | 3326           | 0.4               | 0.0  | 0.0001 | 196          | 17%              |
| 5down   | mitoch. phosphoenolpyruvate carboxykinase 2       | Q16822       | 5106           | 0.3               | 0.1  | 0.0033 | 286          | 32%              |
| 7down   | aminoacylase 1                                    | Q03154       | 95             | 0.4               | 0.1  | 0.0043 | 450          | 40%              |
| 9down   | aldehyde reductase                                | P14550       | 10327          | 0.4               | 0.1  | 0.0054 | 589          | 51%              |
| 11down  | fructose-1,2, bisphosphate aldolase B             | P05062       | 229            | 0.1               | 0.0  | 0.0001 | 473          | 49%              |
| 12down  | fructose-1,2, bisphosphate aldolase B             | P05062       | 229            | 0.3               | 0.1  | 0.0093 | 456          | 42%              |
| 13down  | L-arginine:glycine                                | P50440       | 2628           | 0.3               | 0.0  | 0.0003 | 398          | 44%              |

|        |                                                                              |        |        |     |     |        |     |     |  |
|--------|------------------------------------------------------------------------------|--------|--------|-----|-----|--------|-----|-----|--|
|        | amidinotransferase                                                           |        |        |     |     |        |     |     |  |
| 14down | L-arginine:glycine<br>amidinotransferase                                     | P50440 | 2628   | 0.3 | 0.1 | 0.0013 | 600 | 42% |  |
| 15down | L-arginine:glycine<br>amidinotransferase                                     | P50440 | 2628   | 0.2 | 0.1 | 0.0009 | 566 | 51% |  |
| 16down | L-arginine:glycine<br>amidinotransferase                                     | P50440 | 2628   | 0.3 | 0.1 | 0.0021 | 443 | 37% |  |
| 17down | L-arginine:glycine<br>amidinotransferase                                     | P50440 | 2628   | 0.5 | 0.1 | 0.0091 | 509 | 40% |  |
| 18down | L-arginine:glycine<br>amidinotransferase                                     | P50440 | 2628   | 0.3 | 0.1 | 0.0005 | 370 | 28% |  |
| 19down | betaine-homocysteine<br>methyltransferase                                    | Q93088 | 635    | 0.5 | 0.1 | 0.0041 | 559 | 28% |  |
| 21down | arginine succinate synthetase                                                | P00966 | 445    | 0.3 | 0.1 | 0.0008 | 475 | 54% |  |
| 22down | acetyl-CoA acetyltransferase<br>1                                            | P24752 | 38     | 0.4 | 0.1 | 0.0078 | 480 | 56% |  |
| 27down | peroxiredoxin 1                                                              | Q06830 | 5052   | 0.3 | 0.0 | 0.0002 | 590 | 68% |  |
| 29down | succinate CoA ligase, GDP<br>forming, alpha-subunit                          | P53597 | 8802   | 0.2 | 0.0 | 0.0000 | 260 | 33% |  |
| 33down | ATP synthase delta chain                                                     | P30049 | 513    | 0.3 | 0.1 | 0.0029 | 120 | 47% |  |
| 35down | glutathione-S-transferase,<br>alpha-class, omega 2 subunit                   | P08263 | 119391 | 0.4 | 0.1 | 0.0101 | 513 | 44% |  |
| 40down | mitoch. H+ transporting ATP<br>synthase, F0 complex,<br>subunit d, isoform a | O75947 | 10476  | 0.4 | 0.1 | 0.0010 | 120 | 47% |  |
| 41down | agmatine ureohydrolase<br>(agmatinase)                                       | Q9BSE5 | 79814  | 0.5 | 0.1 | 0.0064 | 367 | 50% |  |
| 42down | mitoch. short-chain enoyl-<br>CoA-hydratase 1                                | P30084 | 1892   | 0.3 | 0.0 | 0.0002 | 522 | 48% |  |
| 43down | calbindin 1                                                                  | P05937 | 793    | 0.3 | 0.1 | 0.0035 | 308 | 32% |  |
